# Supplementary material for: A one-pot synthetic strategy via tandem Suzuki–Heck reactions for the construction of luminescent microporous organic polymers
Source: Royal Society of Chemistry journal article supplement (doi:10.1039/c3py00980g), 2013-08-23
Supplement: c3py00980g.pdf [file c3py00980g.pdf]

# **One-pot Synthetic Strategy *via* Tandem Suzuki/Heck Reactions for the Construction of Luminescent Microporous Organic Polymers**

**Libo Sun, Yongcun Zou, Zhiqiang Liang,\* Jihong Yu\* and Ruren Xu**

State Key Laboratory of Inorganic Synthesis & Preparative Chemistry, Jilin

University, Changchun, 130012, P. R. China

Email: [liangzq@jlu.edu.cn](mailto:liangzq@jlu.edu.cn); [jihong@jlu.edu.cn](mailto:jihong@jlu.edu.cn)

## EXPERIMENTAL SECTION

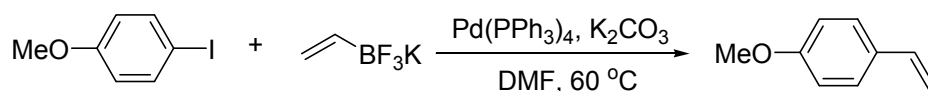

4-Iodoanisole (0.150 g, 0.64 mmol), PVTFB (0.103g, 0.77 mmol), potassium carbonate (0.177g, 1.28 mmol) and DMF (3 mL) were added to a reaction tube. After the system was evacuated and filled up with nitrogen for 3 times, the catalyst  $\text{Pd}(\text{PPh}_3)_4$  (0.025 g, 0.02 mmol) was added and the same evacuation process was done. Then the system was kept at  $60\text{ }^\circ\text{C}$  and stirred for about 12 h. The reaction was quenched with water, extracted with ethyl acetate, washed with brine, and dried over  $\text{MgSO}_4$ . The product was obtained through flash column chromatography (petroleum ether as the eluate). Only 4-methoxystyrene was formed and 1,2-bis(4-methoxyphenyl)ethene was not observed. The  $^1\text{H}$  NMR spectrum shows the ratio of 4-methoxystyrene/4-iodoanisole is ca. 3.9:1. These results indicate that only Suzuki reaction takes place at  $60\text{ }^\circ\text{C}$  in this tandem reaction system.

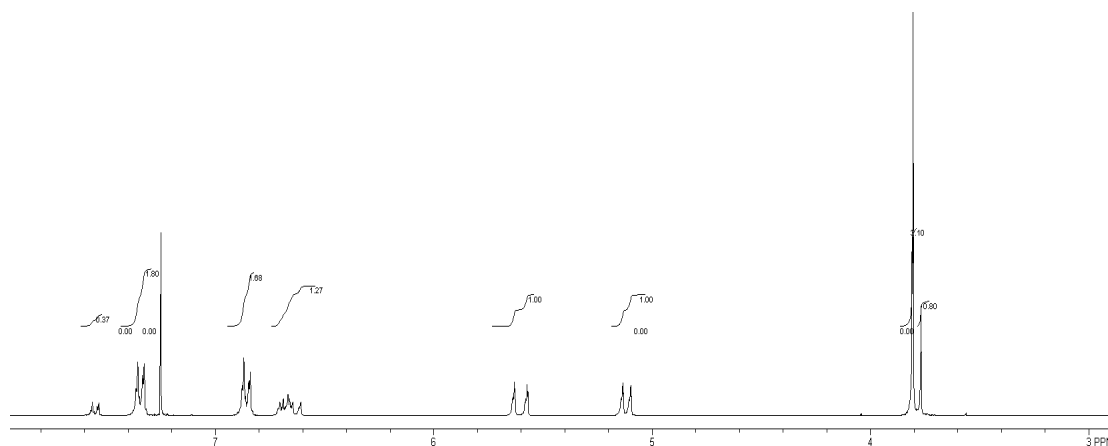

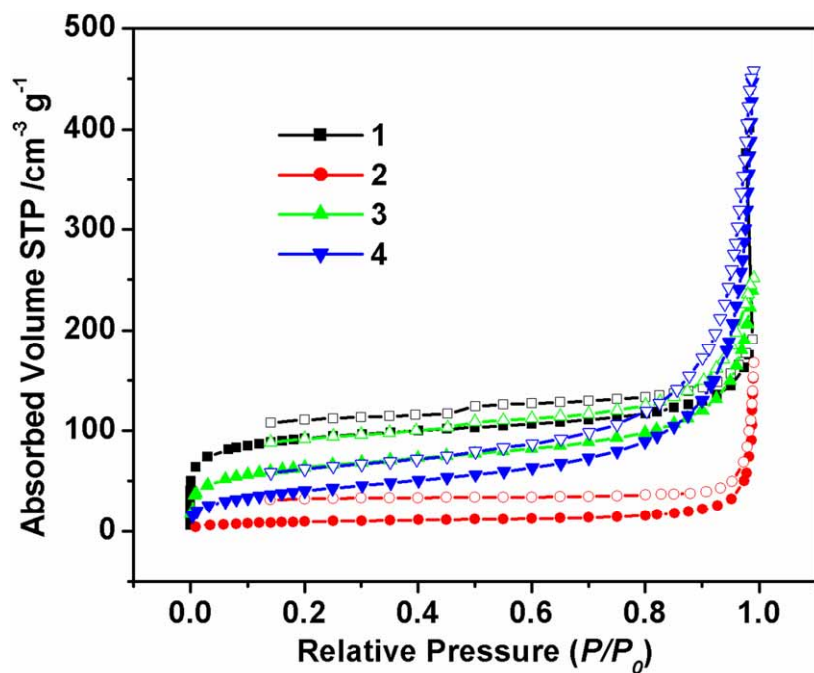

**Fig. S1** N<sub>2</sub> adsorption-desorption isotherms measured at 77K for **LMOP-9**. The numbers 1-4 inset represent the polymers produced through several conditions, which are listed in **Table S1**.

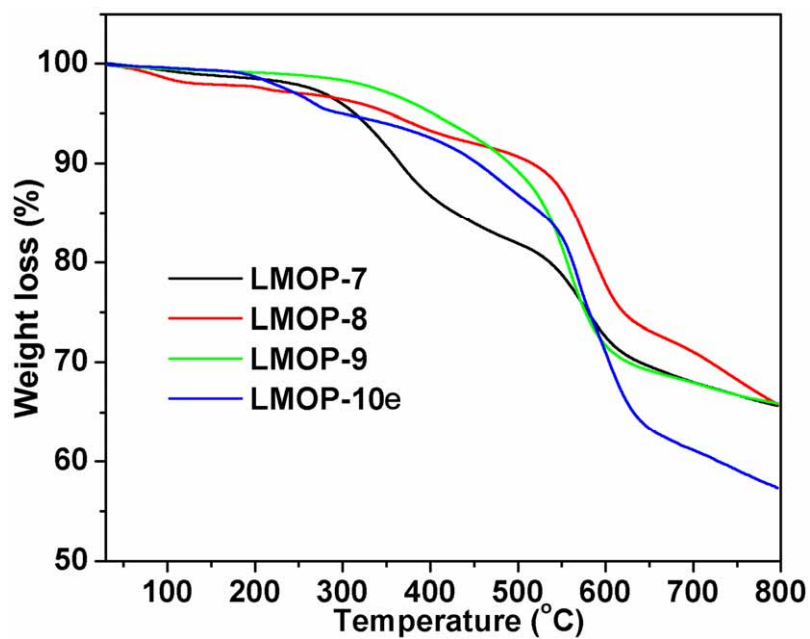

**Fig. S2** The TG curves of LMOPs under N<sub>2</sub>.

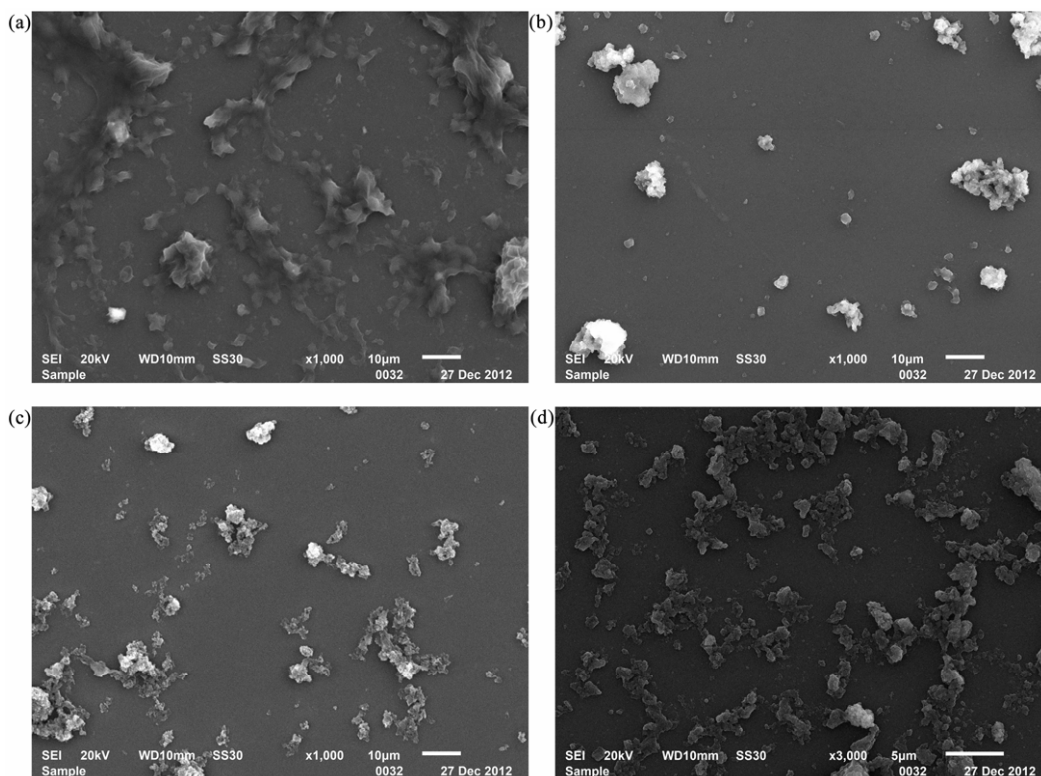

**Fig. S3** Scanning electron microscope images for **LMOP-7** (a), **LMOP-8** (b), **LMOP-9** and **LMOP-10e** (d) at different magnifications. The samples were sputter-coated with gold before analysis.

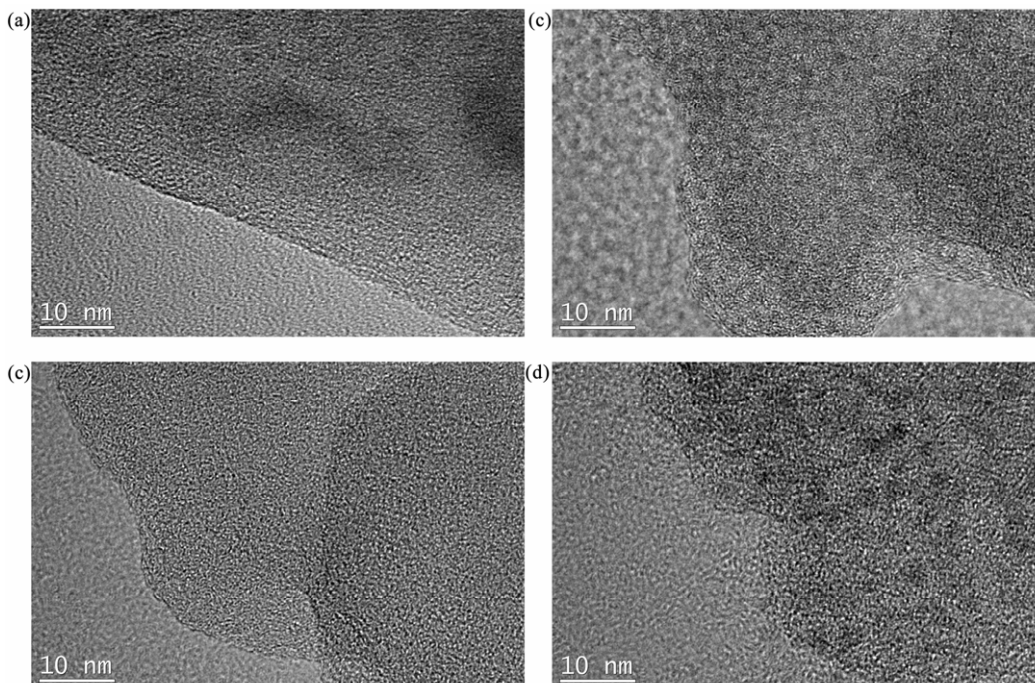

**Fig. S4** Transmission electron microscopy images for **LMOP-7** (a), **LMOP-8** (b), **LMOP-9** (c) and **LMOP-10e** (d).

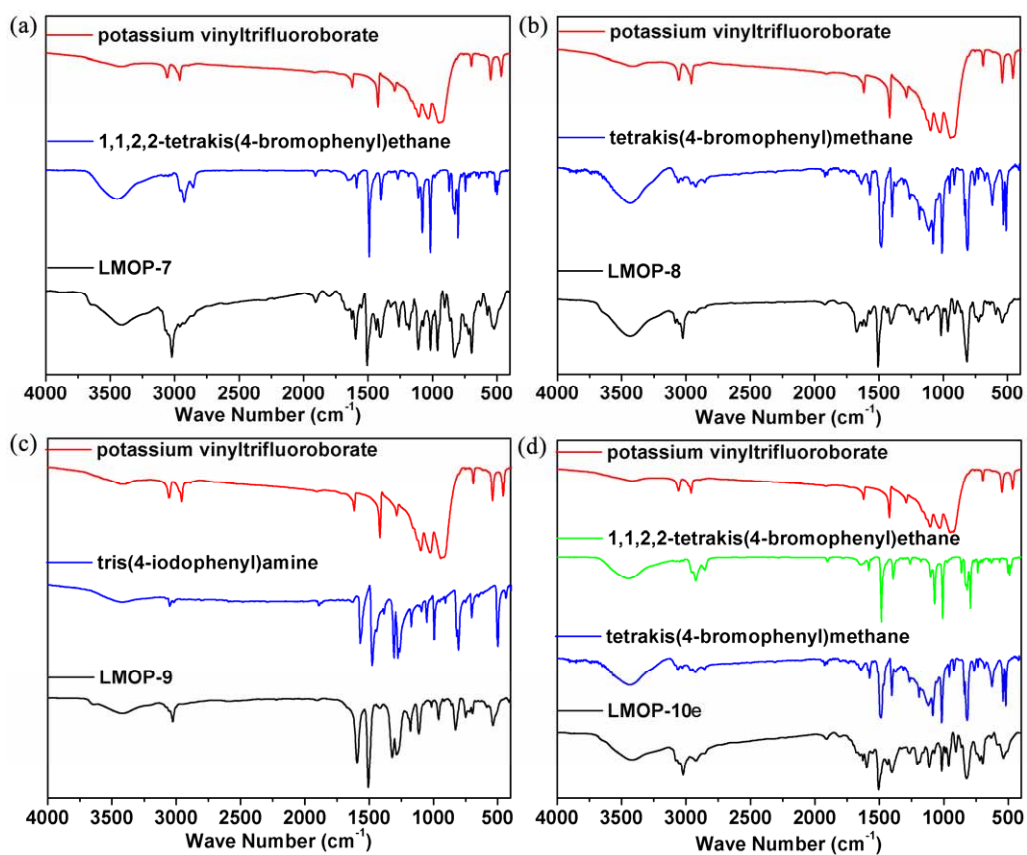

**Fig. S5** FT-IR spectra of potassium vinyltrifluoroborate (PVTFB), aromatic halides and **LMOPs**: (a) PVTFB, TBPE and **LMOP-7**; (b) PVTFB, TBPM and **LMOP-8**; (c) PVTFB, TIPA and **LMOP-9**; (d) PVTFB, TBPE, TBPM and **LMOP-10e**.

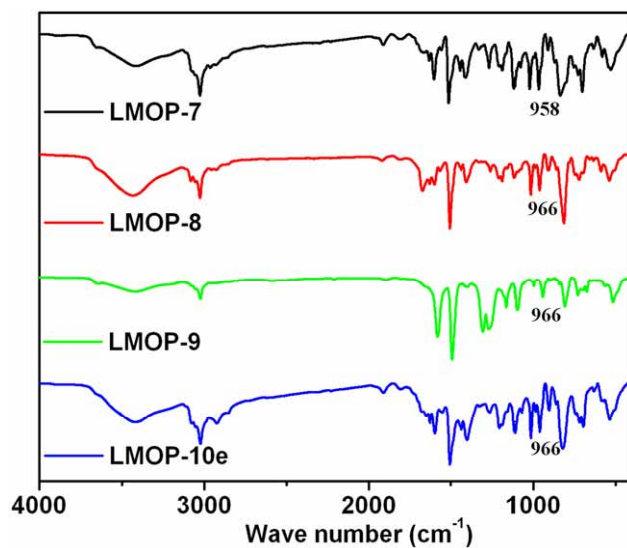

**Fig. S6** FT-IR spectra of **LMOPs**.



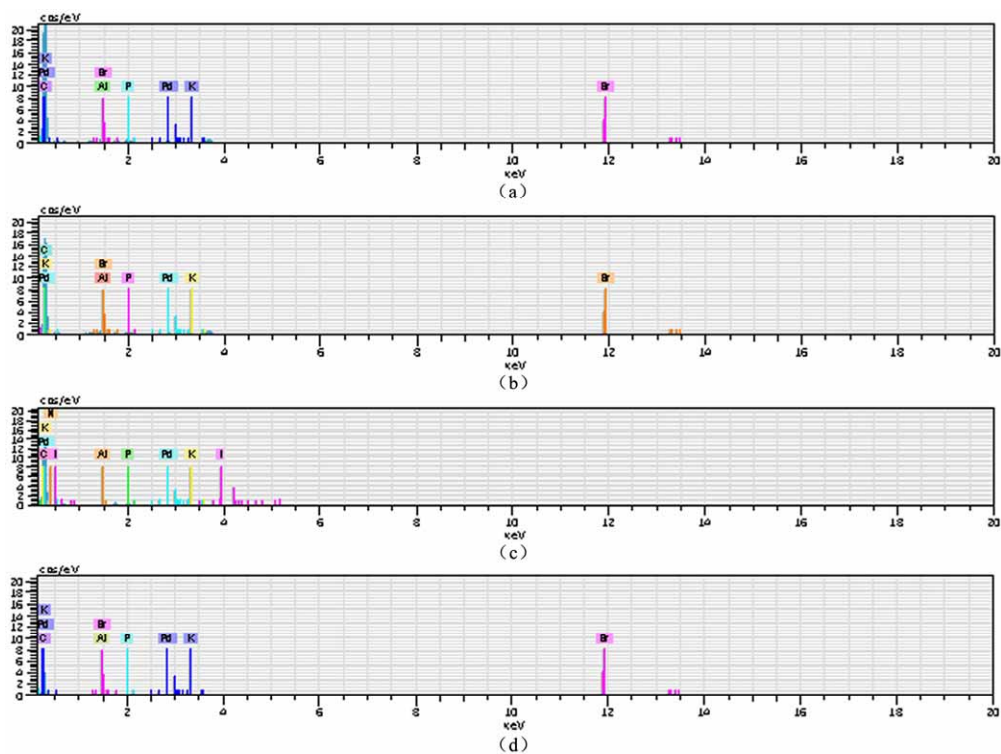

Fig. S7 EDX spectra of LMOPs.

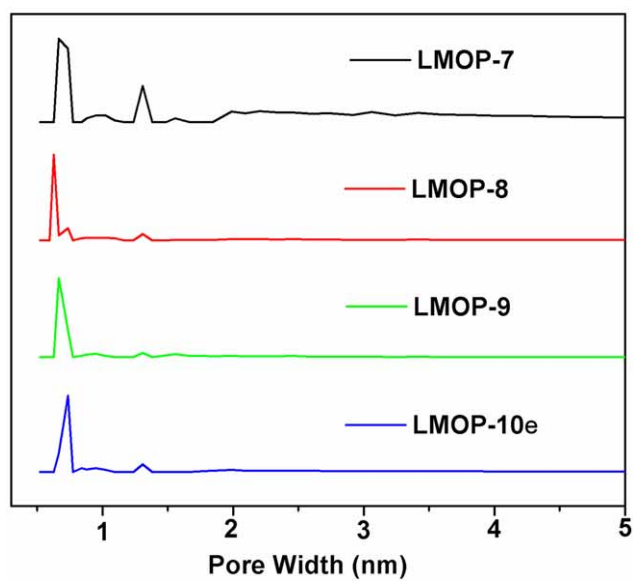

Fig. S8 The pore size distribution of LMOPs calculated by the NLDFIT method.

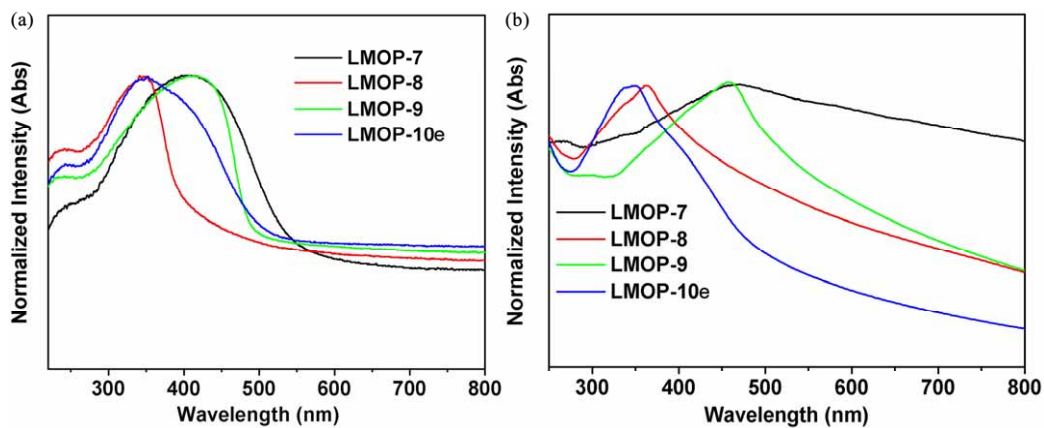

Fig. S9 UV-vis absorption spectra for LMOPs in solid state (a), ethanol (b).

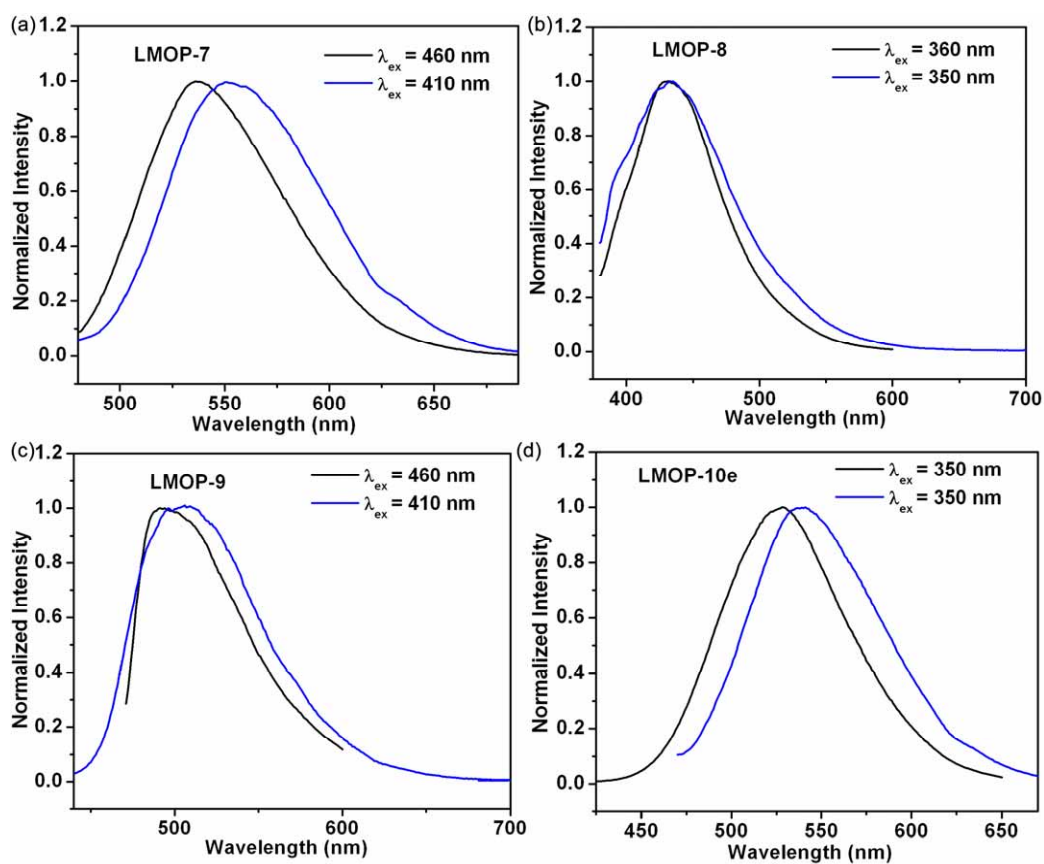

Fig. S10 Luminescent spectra for LMOPs in the solid state (blue) and ethanol (0.05 mg/mL, black).

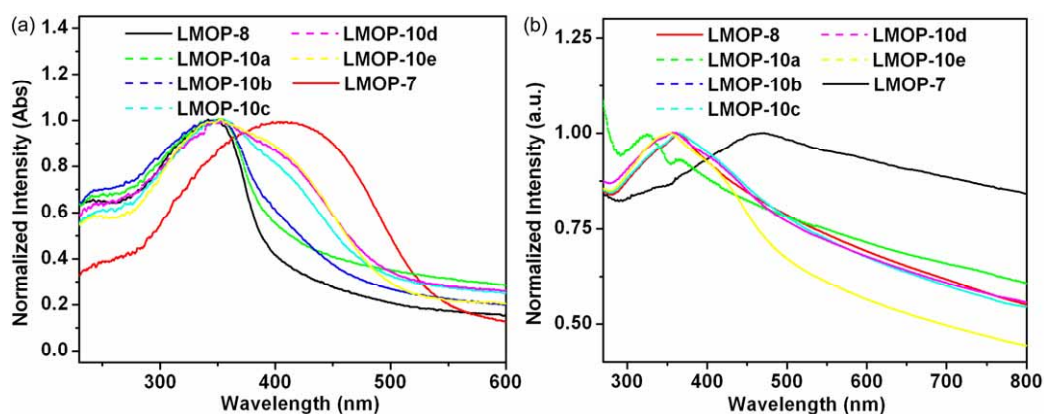

**Fig. S11** UV-vis absorption spectra for **LMOP-10a-e** (TBPE:TBPM = 1:99, 5:95, 15:85, 30:70, 50:50) in solid state (a) and ethanol (b).

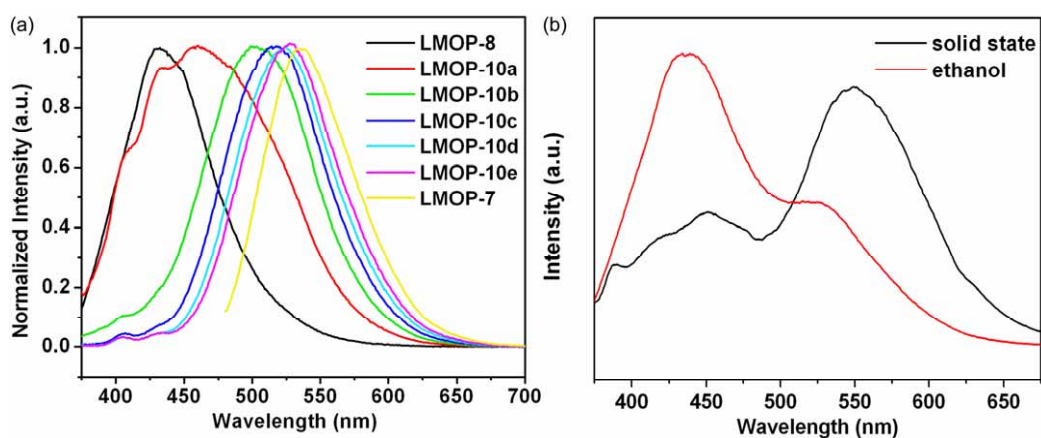

**Fig. S12** (a) Luminescent spectra of **LMOP-10a-e** (TBPE:TBPM = 1:99, 5:95, 15:85, 30:70, 50:50) in ethanol. (b) The emission spectra for mechanically ground mixture of **LMOP-7** and **LMOP-8** (1:1) in the solid state ( $\lambda_{\text{ex}} = 350$  nm) and ethanol ( $\lambda_{\text{ex}} = 360$  nm).



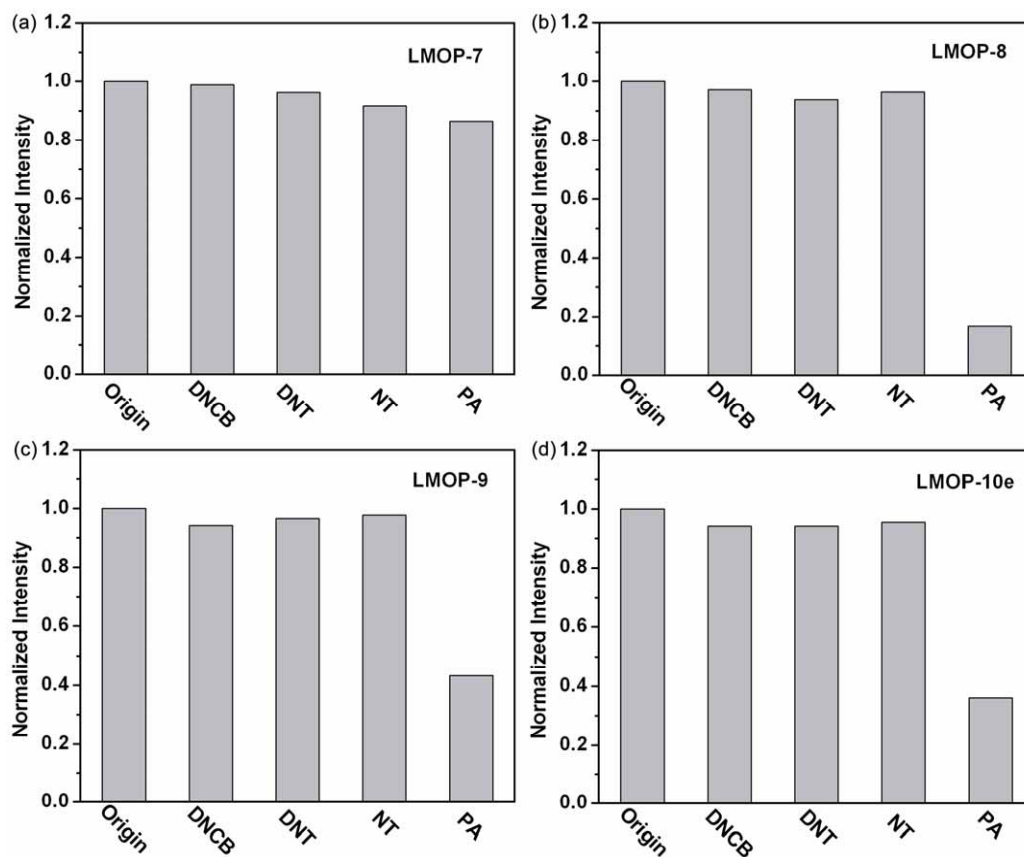

**Fig. S13** The normalized luminescent intensity of LMOPs (a: LMOP-7, b: LMOP-8, c: LMOP-9, d: LMOP-10e) in ethanol upon addition of ca. 46.5  $\mu\text{M}$  different analytes (DNCB: 2,4-dinitrochlorobenzene; DNT: 2,4-dinitrotoluene; NT: 4-nitrotoluene; PA: picric acid).

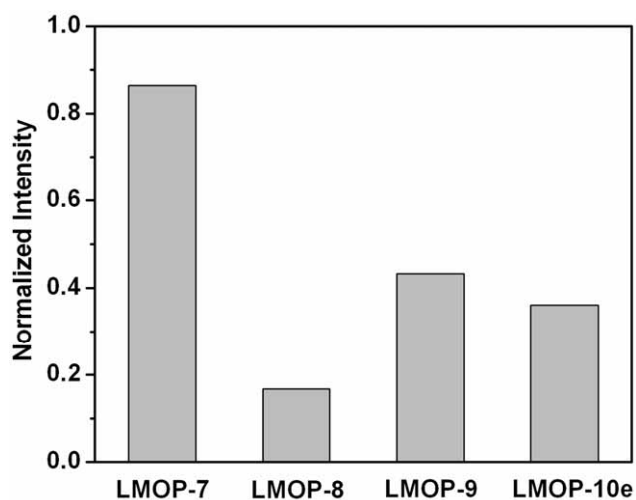

**Fig. S14** The normalized luminescent intensity of LMOPs in ethanol upon addition of ca. 46.5  $\mu\text{M}$  PA.

**Table S1** BET surface areas of **LMOP-9** under different synthetic conditions.

| Entry | Conditions                                                                | $S_{\text{BET}}/\text{m}^2 \text{g}^{-1}$ |
|-------|---------------------------------------------------------------------------|-------------------------------------------|
| 1     | Pd(PPh <sub>3</sub> ) <sub>4</sub> +K <sub>2</sub> CO <sub>3</sub> +DMF   | 318.32                                    |
| 2     | Pd(PPh <sub>3</sub> ) <sub>4</sub> +K <sub>2</sub> CO <sub>3</sub> +DMSO  | 33.99                                     |
| 3     | Pd(PPh <sub>3</sub> ) <sub>4</sub> + Diisopropylamine +DMSO               | 225.77                                    |
| 4     | Pd(PPh <sub>3</sub> ) <sub>4</sub> +Cs <sub>2</sub> CO <sub>3</sub> +DMSO | 148.60                                    |

**Table S2** EDX analyses of **LMOPs**.

| LMOPs           | wt. % |      |      |      | at. % |      |      |      |
|-----------------|-------|------|------|------|-------|------|------|------|
|                 | C     | Br   | I    | Pd   | C     | Br   | I    | Pd   |
| <b>LMOP-7</b>   | 94.58 | 2.75 | -    | 1.35 | 98.85 | 0.43 | -    | 0.16 |
| <b>LMOP-8</b>   | 92.36 | 5.78 | -    | 1.05 | 98.62 | 0.93 | -    | 0.13 |
| <b>LMOP-9</b>   | 90.56 | -    | 1.05 | 1.17 | 94.12 | -    | 0.10 | 0.14 |
| <b>LMOP-10e</b> | 93.45 | 0.10 | -    | 1.55 | 97.60 | 0.02 | -    | 0.18 |

**Table S3** Texture properties of **LMOPs**.

| LMOPs           | $S_{\text{BET}}/\text{m}^2 \text{g}^{-1}$ | $S_{\text{Langmuir}}/\text{m}^2 \text{g}^{-1}$ | $S_{\text{micro}}/\text{m}^2 \text{g}^{-1}$ | $V_{\text{total}}^a/\text{m}^3 \text{g}^{-1}$ | $V_{\text{micro}}^b/\text{m}^3 \text{g}^{-1}$ |
|-----------------|-------------------------------------------|------------------------------------------------|---------------------------------------------|-----------------------------------------------|-----------------------------------------------|
| <b>LMOP-7</b>   | 488                                       | 633                                            | 153                                         | 0.444                                         | 0.067                                         |
| <b>LMOP-8</b>   | 639                                       | 932                                            | 336                                         | 0.601                                         | 0.153                                         |
| <b>LMOP-9</b>   | 318                                       | 429                                            | 169                                         | 0.251                                         | 0.077                                         |
| <b>LMOP-10e</b> | 487                                       | 658                                            | 198                                         | 0.375                                         | 0.089                                         |

<sup>a</sup> Total volume at P/Po = 0.97. <sup>b</sup> The micropore volume calculated from *t*-plot method.
